# Supplementary material for: Transparent organic photovoltaics with a tungsten oxide buffer layer fabricated by nanosecond laser processing for color-neutral performance
Source: Royal Society of Chemistry journal article supplement (doi:10.1039/d3tc01546g), 2023-01-01
Supplement: d3tc01546g1.pdf [file d3tc01546g1.pdf]

## Supporting Information

**Table S1.** Device performances of the proposed initial OPV with/without WO<sub>3</sub> laser buffer layer and each after the laser process.

|                                   | Initial                |                                          |           |            | After laser process    |                                          |           |            |
|-----------------------------------|------------------------|------------------------------------------|-----------|------------|------------------------|------------------------------------------|-----------|------------|
|                                   | V <sub>oc</sub><br>(V) | J <sub>sc</sub><br>(mA/cm <sup>2</sup> ) | FF<br>(%) | PCE<br>(%) | V <sub>oc</sub><br>(V) | J <sub>sc</sub><br>(mA/cm <sup>2</sup> ) | FF<br>(%) | PCE<br>(%) |
| <b>Without<br/>WO<sub>3</sub></b> | 0.81                   | 24.72                                    | 60.78     | 12.17      | 0.80                   | 11.58                                    | 54.09     | 5.01       |
|                                   | 0.81                   | 23.49                                    | 62.03     | 11.80      | 0.02                   | 3.07                                     | 20.44     | 0.01       |
|                                   | 0.80                   | 23.51                                    | 60.11     | 11.31      | 0.80                   | 11.68                                    | 56.49     | 5.28       |
|                                   | 0.79                   | 24.02                                    | 59.20     | 11.23      | 0.78                   | 11.90                                    | 51.73     | 4.80       |
|                                   | 0.80                   | 24.23                                    | 62.59     | 12.13      | 0.19                   | 10.04                                    | 27.76     | 0.53       |
|                                   | 0.81                   | 23.26                                    | 62.37     | 11.75      | 0.78                   | 10.64                                    | 52.72     | 4.38       |
|                                   | 0.80                   | 23.73                                    | 60.89     | 11.56      | 0.80                   | 11.27                                    | 53.36     | 4.81       |
|                                   | 0.81                   | 24.24                                    | 58.08     | 11.41      | 0.17                   | 9.42                                     | 26.91     | 0.43       |
|                                   | 0.80                   | 23.81                                    | 60.78     | 11.58      | 0.77                   | 11.29                                    | 49.08     | 4.26       |
|                                   | 0.79                   | 24.28                                    | 58.74     | 11.27      | 0.13                   | 8.40                                     | 24.10     | 0.26       |
|                                   | 0.80                   | 24.00                                    | 57.81     | 11.10      | 0.03                   | 4.00                                     | 16.99     | 0.02       |
|                                   | 0.81                   | 23.29                                    | 63.95     | 12.07      | 0.02                   | 3.25                                     | 24.71     | 0.02       |
| <b>With<br/>WO<sub>3</sub></b>    | 0.81                   | 23.29                                    | 64.73     | 12.21      | 0.80                   | 11.33                                    | 57.25     | 5.19       |
|                                   | 0.81                   | 23.83                                    | 61.65     | 11.90      | 0.63                   | 11.16                                    | 31.84     | 2.24       |
|                                   | 0.81                   | 24.61                                    | 61.31     | 12.22      | 0.80                   | 11.92                                    | 58.65     | 5.59       |
|                                   | 0.82                   | 24.28                                    | 64.51     | 12.84      | 0.79                   | 11.92                                    | 55.49     | 5.22       |
|                                   | 0.80                   | 23.80                                    | 61.73     | 11.75      | 0.80                   | 11.86                                    | 58.30     | 5.53       |
|                                   | 0.81                   | 24.08                                    | 60.50     | 11.80      | 0.03                   | 5.16                                     | 22.26     | 0.03       |
|                                   | 0.81                   | 23.54                                    | 63.79     | 12.16      | 0.80                   | 12.33                                    | 53.67     | 5.30       |
|                                   | 0.80                   | 23.90                                    | 62.39     | 11.93      | 0.80                   | 12.68                                    | 58.04     | 5.89       |
|                                   | 0.80                   | 23.63                                    | 61.67     | 11.66      | 0.80                   | 11.58                                    | 53.63     | 4.97       |
|                                   | 0.80                   | 23.62                                    | 60.80     | 11.49      | 0.79                   | 11.99                                    | 56.01     | 5.30       |
|                                   | 0.80                   | 24.14                                    | 62.33     | 12.04      | 0.78                   | 11.89                                    | 52.33     | 4.85       |
|                                   | 0.81                   | 22.68                                    | 61.60     | 11.32      | 0.78                   | 10.73                                    | 54.35     | 4.55       |

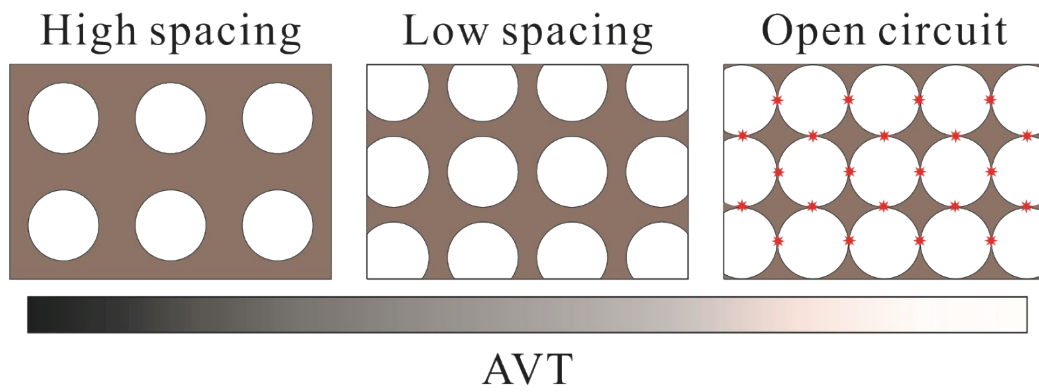

**Figure S1.** Schematic structure of the circular pattern with varying spacing

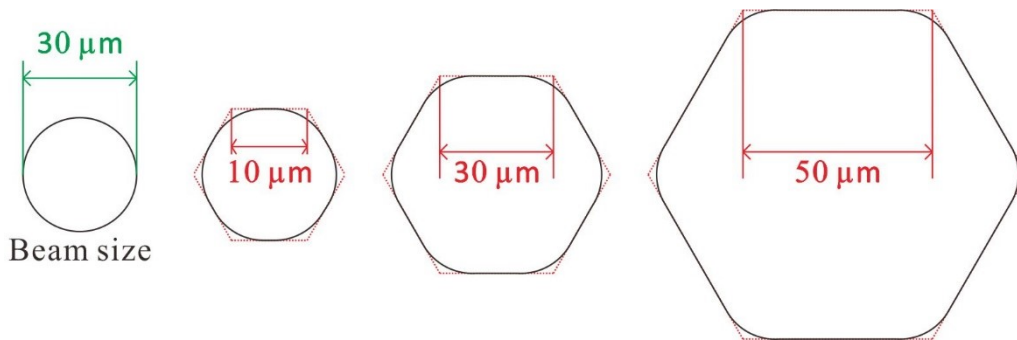

**Figure S2.** Schematic structure illustrating the limits of laser beam size and hexagon width

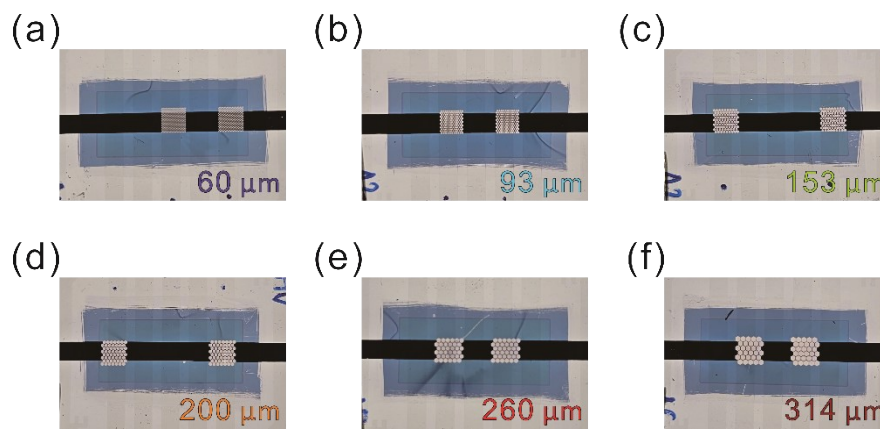

**Figure S3.** Comparative physical photographs of TPVs exhibiting varying hexagon widths.
